# Supplementary material for: Gasdermin E mediates photoreceptor damage by all-trans-retinal in the mouse retina
Source: PubMed Central journal article supplement — J Biol Chem. 2021 Dec 29;298(2):101553. doi: 10.1016/j.jbc.2021.101553 (PMC8800116; doi:10.1016/j.jbc.2021.101553), 2021-12-29

## Supplementary Information

### **Gasdermin E mediates photoreceptor damage by all-*trans*-retinal in the mouse retina**

**Binxiang Cai<sup>1</sup>, Chunyan Liao<sup>1</sup>, Danxue He<sup>1</sup>, Jingmeng Chen<sup>2</sup>, Jiahuai Han<sup>3</sup>, Jiaying Lu<sup>1</sup>, Kaiqi Qin<sup>1</sup>, Wenxu Liang<sup>1</sup>, Xiaoling Wu<sup>1</sup>, Zuguo Liu<sup>1</sup>, and Yalin Wu<sup>1,4,5,\*</sup>**

<sup>1</sup>Fujian Provincial Key Laboratory of Ophthalmology and Visual Science, Fujian Engineering and Research Center of Eye Regenerative Medicine, Department of Ophthalmology, Xiang'an Hospital of Xiamen University, Eye Institute of Xiamen University, School of Medicine, Xiamen University, Xiamen City, Fujian 361102, China

<sup>2</sup>School of Medicine, Xiamen University, Xiamen City, Fujian 361102, China

<sup>3</sup>State Key Laboratory of Cellular Stress Biology, Innovation Center for Cell Biology, School of Life Sciences, Xiamen University, Xiamen City, Fujian 361102, China

<sup>4</sup>Xiamen Eye Center of Xiamen University, School of Medicine, Xiamen University, Xiamen City, Fujian 361016, China

<sup>5</sup>Shenzhen Research Institute of Xiamen University, Shenzhen City, Guangdong 518063, China

\*To whom correspondence should be addressed: Yalin Wu, Fujian Provincial Key Laboratory of Ophthalmology and Visual Science, Fujian Engineering and Research Center of Eye Regenerative Medicine, Department of Ophthalmology, Xiang'an Hospital of Xiamen University, Eye Institute of Xiamen University, School of Medicine, Xiamen University, Xiang'an South Road, Xiang'an District, Xiamen City, China; or Xiamen Eye Center of Xiamen University, Wutong West Road, Huli District, Xiamen City, China; E-mail: [yalinw@xmu.edu.cn](mailto:yalinw@xmu.edu.cn).

**Supplementary Figure S1. Characterization of 661W photoreceptor cells.** Reverse transcription PCR analysis of cone photoreceptor gene *Opn1sw* in 661W photoreceptor cells. Neural retina and pancreas obtained from C57BL/6J WT mice served as positive and negative controls, respectively. *β-actin* was used as a loading control.

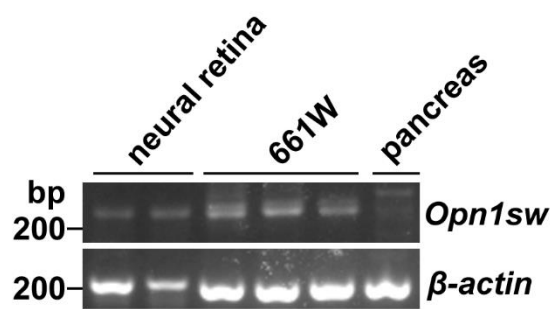

**Supplementary Figure S2. Western blot analysis of Cyt *c*, GSDME-FL and GSDME-N in the cytosol or mitochondria of 661W photoreceptor cells treated with 5- $\mu$ M atRAL for 6 h. Control cells were exposed to DMSO alone. GAPDH and COX IV served as loading controls. Molecular mass markers (kDa) were indicated to the *left* of immunoblots.**

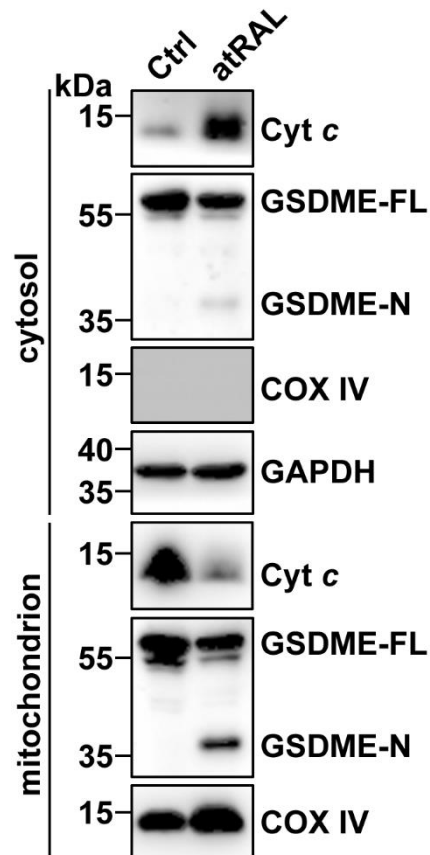

**Supplementary Figure S3. Western blot analysis of RIP3 in RPE and neural retina from *Rip3*<sup>-/-</sup> and C57BL/6J WT mice at two months of age. *Rip3*<sup>-/-</sup> mice have a genetic background of C57BL/6J. GAPDH was used as an internal control.**

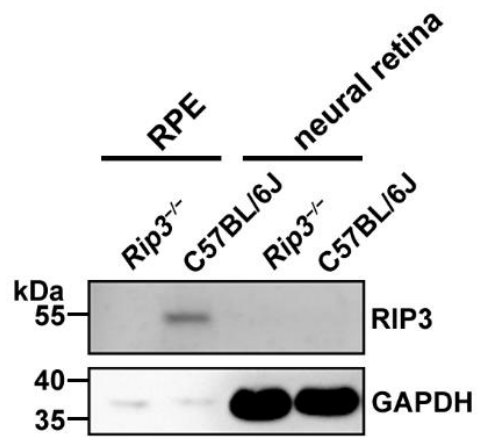

**Supplementary Figure S4. Changes over time in the viability of *Gsdme*<sup>-/-</sup> 661W photoreceptor cells after 6 h of exposure to 5- $\mu$ M atRAL.** WT and *Gsdme*<sup>-/-</sup> 661W photoreceptor cells seeded into 96-well plates ( $1.5 \times 10^4$  cells per well) were cultured overnight, and then incubated with 5- $\mu$ M atRAL or DMSO alone for 6 h. The culture medium was removed and replaced with fresh Dulbecco's modified Eagle's medium (DMEM) (Gibco, Shanghai, China). After additional incubation for 6 or 12 h, cell viability was measured by MTS assay. Note that DMSO-treated control cells were incubated in fresh DMEM for additional 12 h. Statistical analyses were determined using two-way ANOVA with Tukey's post-test.  $F_{0.05}(3,40)=33.01$ ,  $P<0.0001$ .

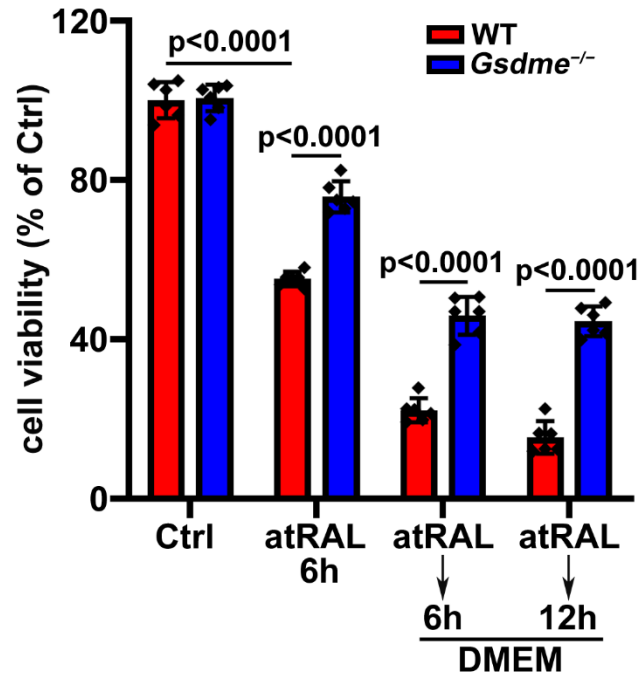

**Supplementary Figure S5. Full western blots.** Boxes in *red* indicate selected western blot results.

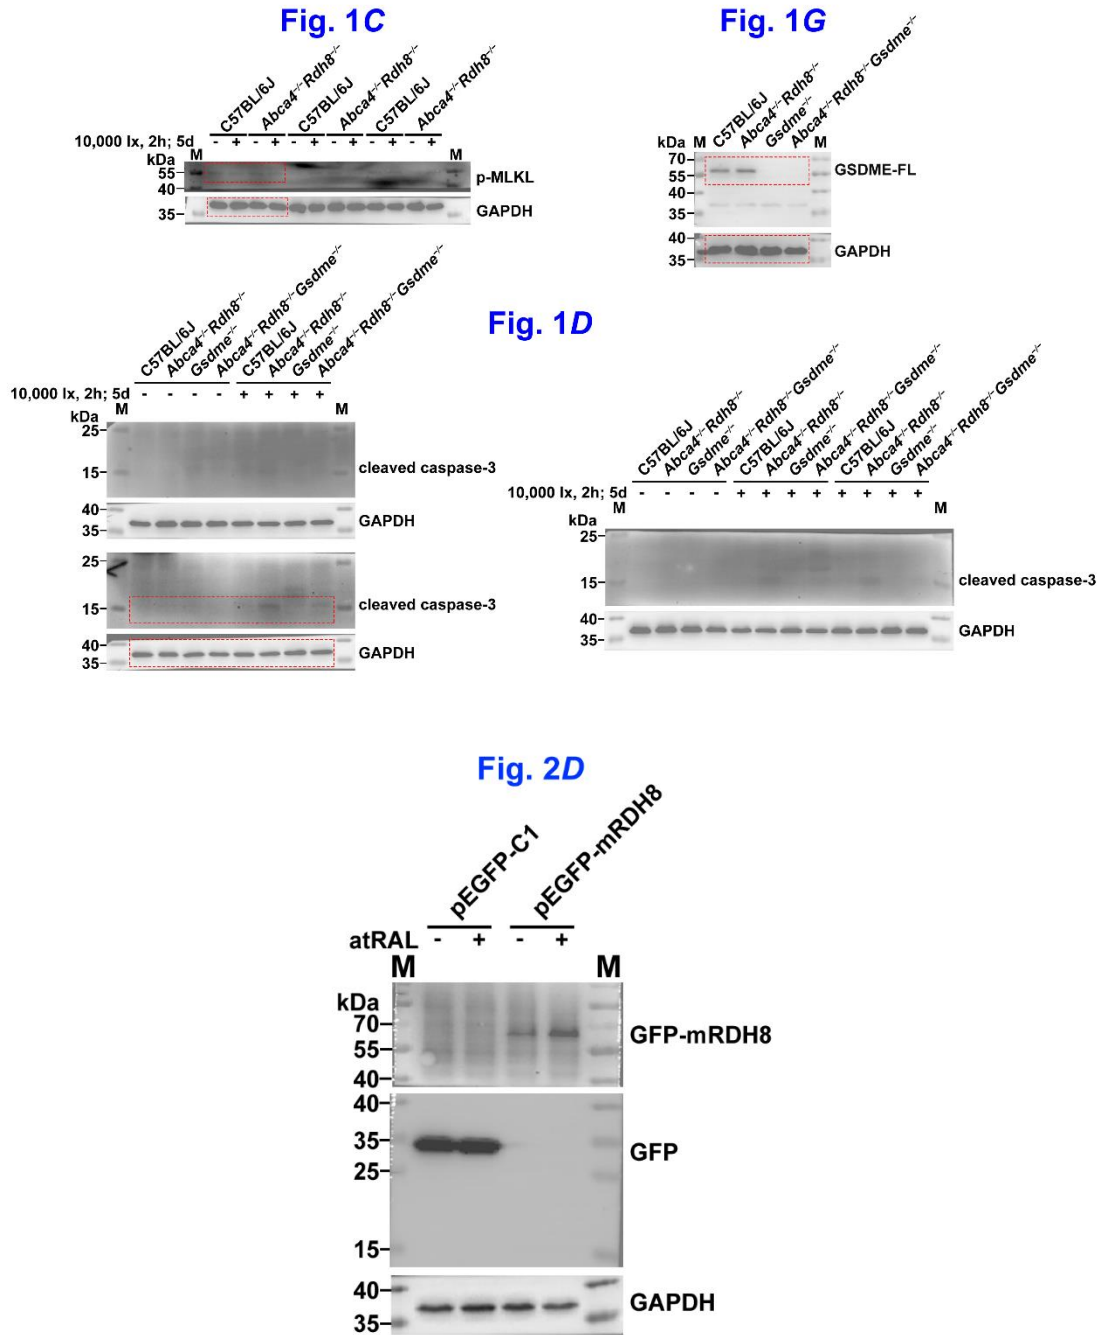

**Fig. 3, C, E and I**

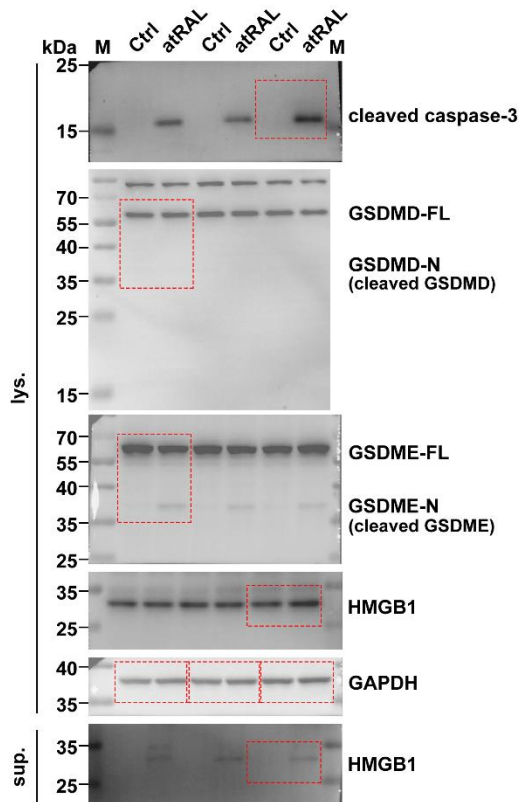

**Fig. 3J**

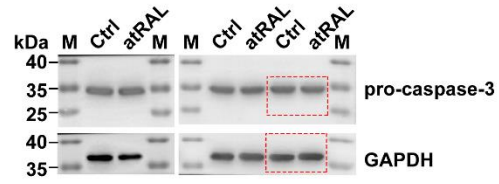

**Fig. 3L**

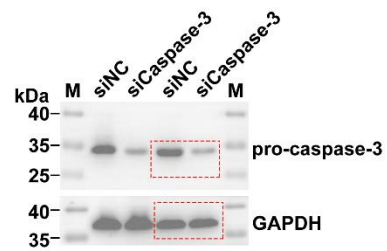

**Fig. 3P**

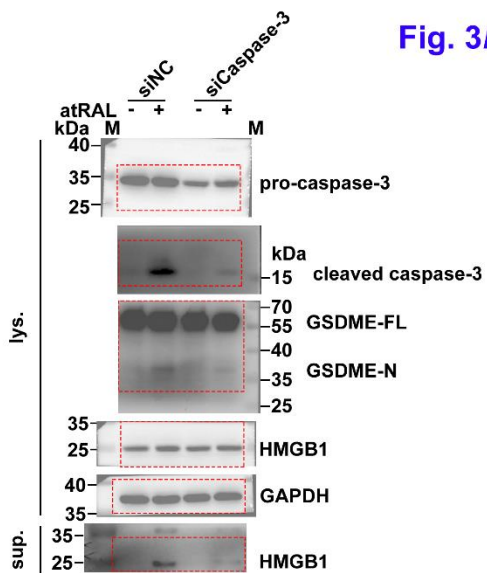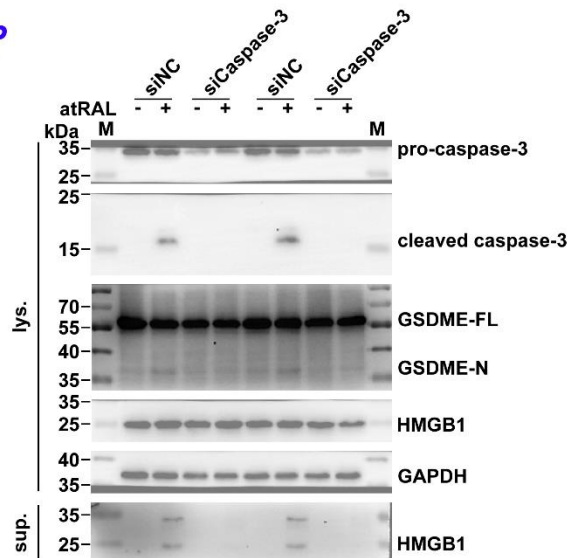

**Fig. 4A**

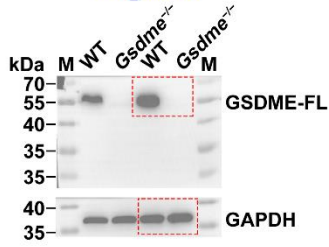

**Fig. 4F**

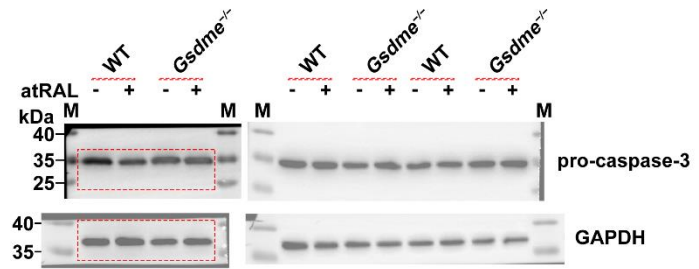

**Fig. 4F**

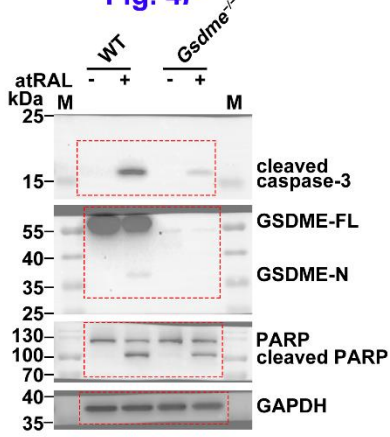

**Fig. 4, F and H**

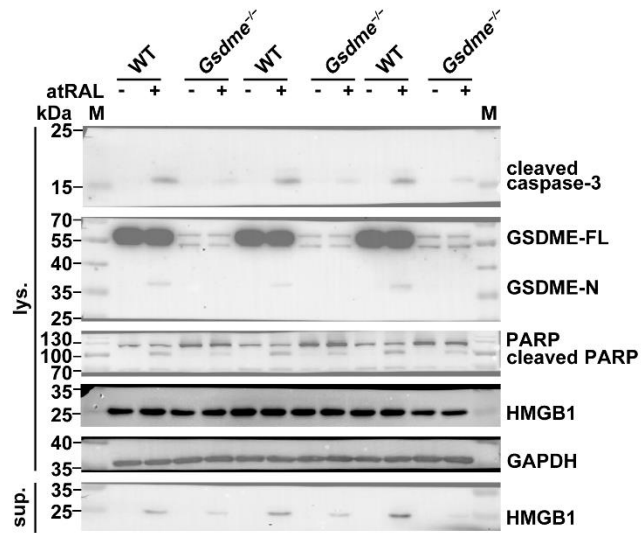

**Fig. 4H**

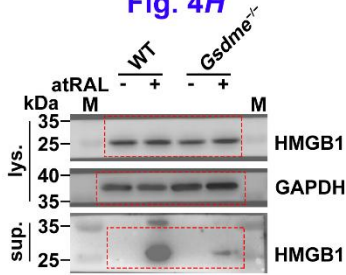



Fig. 5A

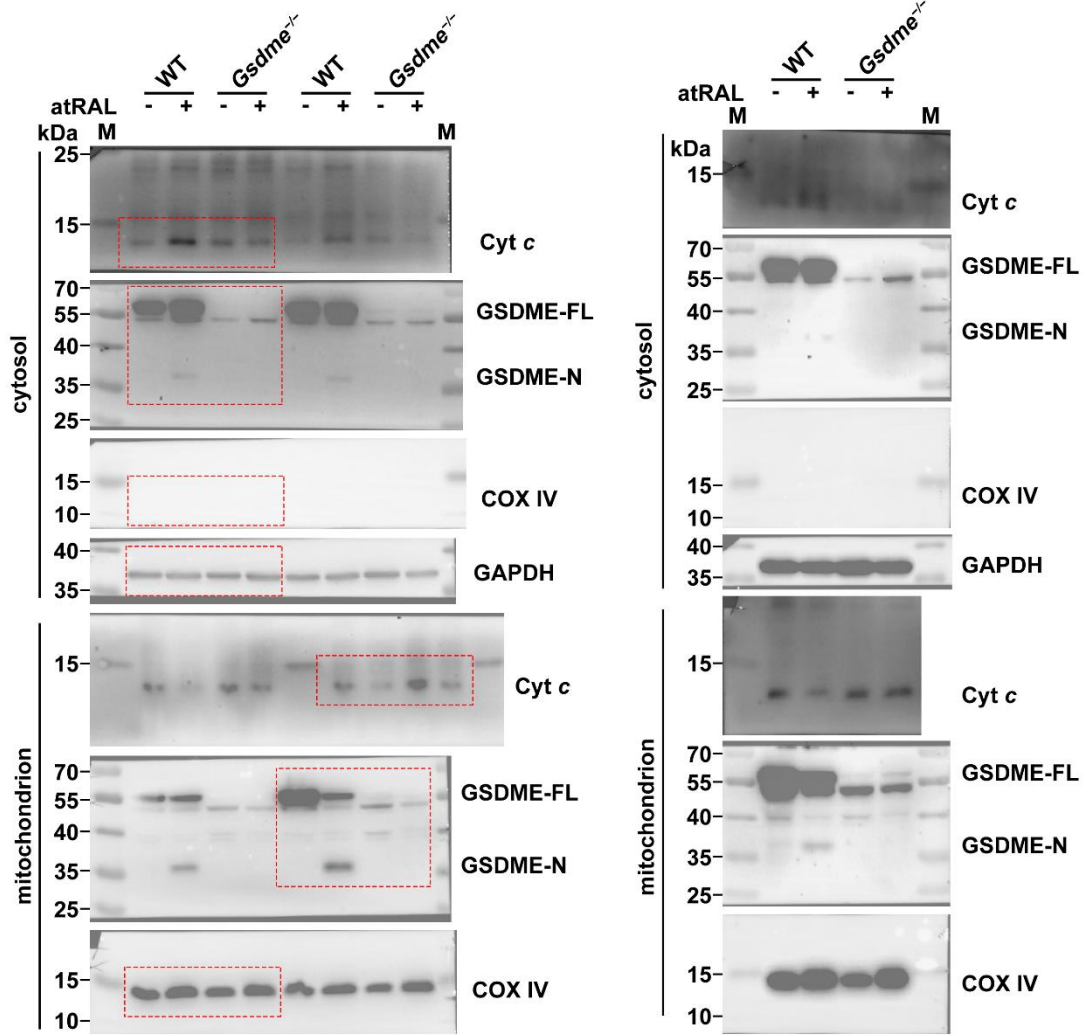

**Fig. 6, B and D**

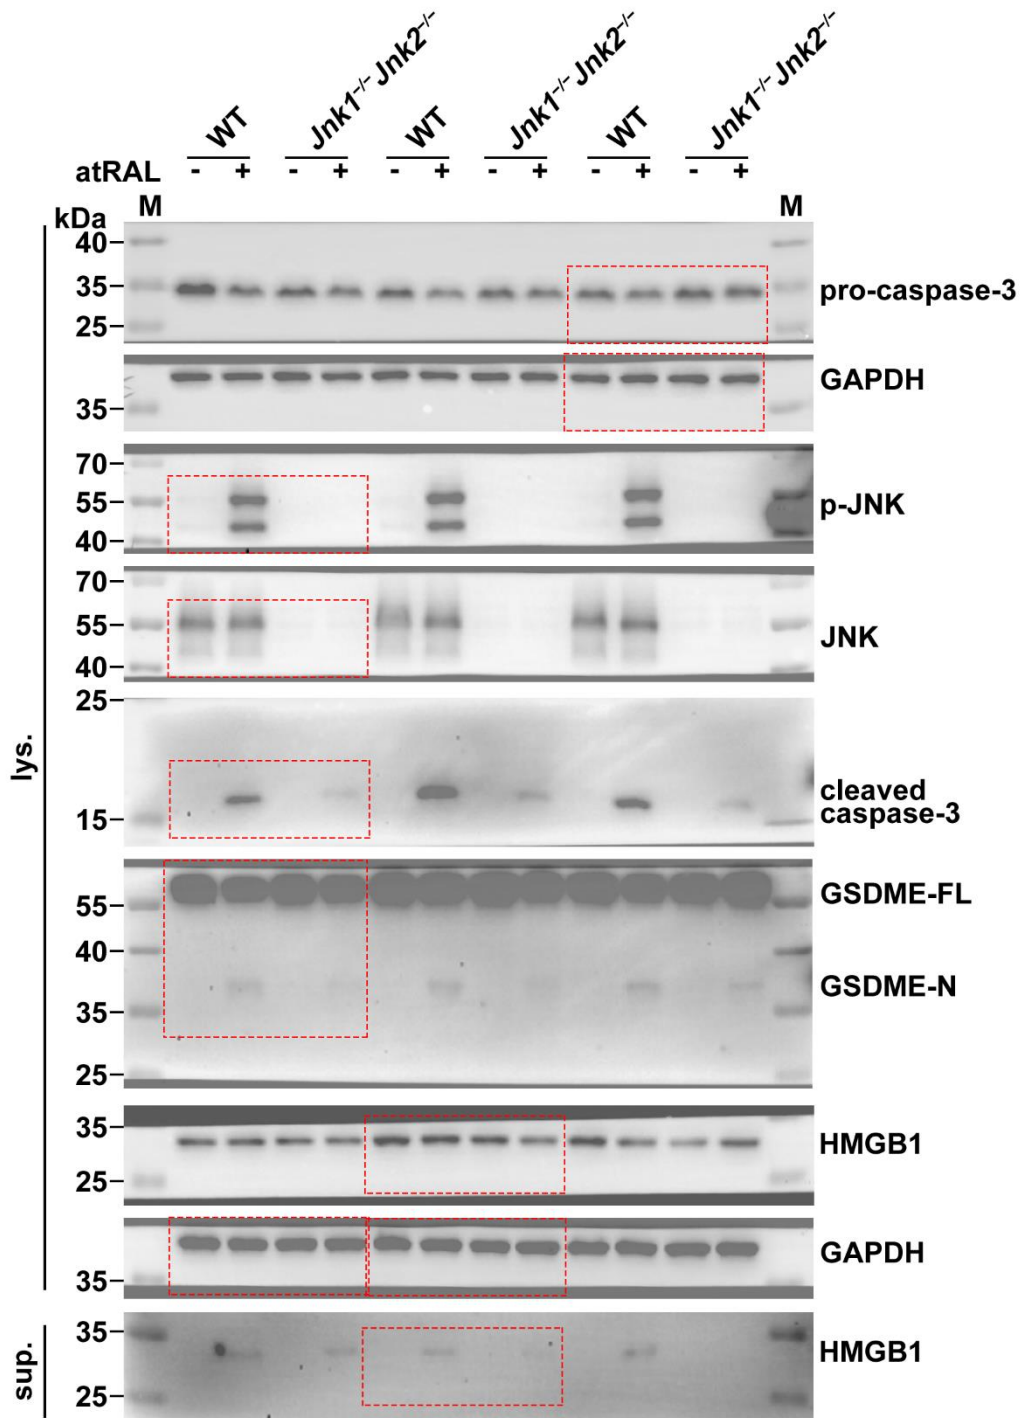

Supplement: mmc1.pdf [file mmc1.pdf]
